# Supplementary material
Source: PubMed Central journal article supplement (PMC10615859)
Supplement: NIHMS1927991-supplement-Supplemental_Publication_Material.pdf [file NIHMS1927991-supplement-Supplemental_Publication_Material.pdf]

1 **SUPPLEMENTAL MATERIAL**

2

Table S1

*Cerebrovascular reactivity values by ROI*

| ROI               | CVR range (SD)        | Log-transformed CVR range (SD) | Average BOLD-Et-CO <sub>2</sub> correlation coefficient (SD) |
|-------------------|-----------------------|--------------------------------|--------------------------------------------------------------|
| Basal Ganglia     | 0.079 to 0.425 (0.06) | -1.10 to -0.370 (0.12)         | 0.800 (0.09)                                                 |
| Centrum Semiovale | 0.011 to 0.066 (0.01) | -1.95 to -1.18 (0.17)          | 0.500 (0.18)                                                 |
| Midbrain          | 0.074 to 0.443 (0.05) | -1.13 to -0.35 (0.11)          | 0.691 (0.13)                                                 |
| Hippocampus       | 0.069 to 0.419 (0.06) | -1.16 to -0.38 (0.13)          | 0.697 (0.13)                                                 |

3 Values are the range of unadjusted CVR values (standard deviation) and log-transformed CVR  
 4 values (standard deviation) in the basal ganglia, centrum semiovale, midbrain, and hippocampus.  
 5 The CVR-MRICloud toolbox also provides the BOLD-Et-CO<sub>2</sub> correlation coefficient for each  
 6 ROI as a quality control measure.

7

8

9

10

Table S2

*Mixed effects model: relationships between log-transformed baseline Basal Ganglia CVR and longitudinal ePVS in four ROIs*

| ROI               |                                               |
|-------------------|-----------------------------------------------|
| Basal Ganglia     | -3.18 (3.92), p = 0.002**, CI: -5.11 to -1.24 |
| Centrum Semiovale | 17.52 (17.23), p = 0.315, CI: -17.17 to 52.21 |
| Midbrain          | 1.63 (2.67), p = 0.613, CI: -3.74 to -7.01    |
| Hippocampus       | -1.26 (2.91), p = 0.668, CI: -7.12 to 4.60    |

11 Values are measure coefficient estimate (SE), p value, 95% Confidence Interval. ePVS, enlarged  
 12 perivascular spaces; BG, basal ganglia.

13 Model: adjusted for age, sex, and time point.

14 \*p < 0.05

15 \*\*p ≤ 0.01

16 \*\*\*p ≤ 0.001
